# Supplementary material for: Exploring the interactions between protein coronated CdSe quantum dots and nanoplastics
Source: Royal Society of Chemistry journal article supplement (doi:10.1039/d1nj00441g), 2021-01-01
Supplement: d1nj00441g1.pdf [file d1nj00441g1.pdf]

## **Exploring the interactions between protein coronated CdSe quantum dots and nanoplastics**

Debolina Chakraborty<sup>1</sup>, Sanjay Naik<sup>2</sup>, Sanjit Kumar<sup>2</sup>, N. Chandrasekaran<sup>3</sup>, Amitava Mukherjee<sup>3\*</sup>

<sup>1</sup> School of Advanced Sciences, Vellore Institute of Technology, Vellore, India.

<sup>2</sup> Centre for Bioseparation Technology, Vellore Institute of Technology, Vellore, India.

<sup>3</sup> Centre for Nanobiotechnology, Vellore Institute of Technology, Vellore, India.

### **Supplementary Information**

**\*Corresponding author**

**Dr. Amitava Mukherjee**  
**Senior Professor & Director**  
**Centre for Nanobiotechnology**  
**Vellore Institute of Technology, Vellore – 632014, India.**  
**Email: [amit.mookerjea@gmail.com](mailto:amit.mookerjea@gmail.com), [amitav@vit.ac.in](mailto:amitav@vit.ac.in)**  
**Phone: 91 416 2202620**

**Table S1.** Mean hydrodynamic diameter of functionalized CdSe QDs in deionized water

| <b>Nanoparticle</b> | <b>Deionized water</b> | <b>DMEM medium</b> |
|---------------------|------------------------|--------------------|
| <b>Carboxy=QDs</b>  | 25.3±0.7               | 34.6±1.7           |
| <b>Amine-QDs</b>    | 22.7± 1.2              | 32.3 ±1.3          |

**Table S2.** Percentage bound protein corona on functionalized CdSe QDs and mean hydrodynamic diameter

| <b>Amine-QDs</b>                       |                 | <b>Carboxy=QDs</b>                     |                 |
|----------------------------------------|-----------------|----------------------------------------|-----------------|
| <b>Bound protein concentration (%)</b> | <b>MHD (nm)</b> | <b>Bound protein concentration (%)</b> | <b>MHD (nm)</b> |
| 20±1.1                                 | 42.3±1.7        | 27.3±1.9                               | 43.6±2.7        |
| 65.6±2.3                               | 87.5±2.8        | 52.8±1.3                               | 71.5±2.3        |
| 63.7±1.4                               | 94.5±2.9        | 45.5±2.8                               | 82.1±2.8        |
| 61.9±0.9                               | 97.8±3.8        | 43.7±2.9                               | 87.3±2.5        |

**Table S3.** MHD and zeta potential measurement of functionalized QDs after protein coronation

| <b>Time (h)</b> | <b>Amine-QDs</b> |                            | <b>Carboxy=QDs</b> |                            |
|-----------------|------------------|----------------------------|--------------------|----------------------------|
|                 | <b>MHD (nm)</b>  | <b>Zeta-potential (mV)</b> | <b>MHD (nm)</b>    | <b>Zeta-potential (mV)</b> |
| <b>5</b>        | 42.3±1.7         | +12.1                      | 43.6±2.7           | -21.3                      |
| <b>0.5</b>      | 87.5±2.8         | +7.6                       | 71.5±2.3           | -17.5                      |
| <b>12</b>       | 94.5±2.9         | -8.9                       | 82.1±2.8           | -22.5                      |
| <b>24</b>       | 97.8±3.8         | -10.2                      | 87.3±2.5           | -27.3                      |
